# Supplementary material for: Genetic Detection of Lint Percentage Applying Single-Locus and Multi-Locus Genome-Wide Association Studies in Chinese Early-Maturity Upland Cotton
Source: Front Plant Sci. 2019 Aug 2;10:964. doi: 10.3389/fpls.2019.00964 (PMC6688134; doi:10.3389/fpls.2019.00964)
Supplement: Supplementary file 1 [file Table_1.docx]

| Table S1 Information of 160 early-maturity upland cotton accessions |
| --- |
| | No. | Varieties | Growing areas | No. | Varieties | Growing areas | | --- | --- | --- | --- | --- | --- | | 1 | zhongzao0191 | YRR | 41 | Jinmian23 | YRR | | 2 | zhongzao0418 | YRR | 42 | Jinmian5 | YRR | | 3 | zhongzao0618 | YRR | 43 | liaomian10 | NSEMR | | 4 | zhongzao0712 | YRR | 44 | liaomian17 | NSEMR | | 5 | zhongzao0811 | YRR | 45 | liaomian5 | NSEMR | | 6 | zhongzao0822 | YRR | 46 | liaomian6 | NSEMR | | 7 | zhongzao1832 | YRR | 47 | liaomian7 | NSEMR | | 8 | zhongzao1239 | YRR | 48 | liaomian9 | NSEMR | | 9 | PB12-1-10 | YRR | 49 | liaomianduanjie | NSEMR | | 10 | PB12-1-7 | YRR | 50 | lu154 | YRR | | 11 | PB12-1-8 | YRR | 51 | lu890 | YRR | | 12 | zhongzao1476 | YRR | 52 | lumian2153 | YRR | | 13 | zhongzao1222 | YRR | 53 | nongken5 | NIR | | 14 | zhongzao2201 | YRR | 54 | shan70 | YRR | | 15 | SQ152201 | YRR | 55 | shizao1 | YRR | | 16 | zhongzao2214 | YRR | 56 | shizao2 | YRR | | 17 | SQ152224 | YRR | 57 | shizao3 | YRR | | 18 | 2011SS | YRR | 58 | xia13-7 | YRR | | 19 | QS2012-3 | YRR | 59 | xia25 | YRR | | 20 | QS2012-4 | YRR | 60 | xiazao1 | YRR | | 21 | 29-41 | YRR | 61 | xiazao2 | YRR | | 22 | 29-42 | YRR | 62 | xiazao3 | YRR | | 23 | 6426 | YRR | 63 | xinluzao11 | NIR | | 24 | K640 | YRR | 64 | xinluza | NIR | | 25 | N82 | YRR | 65 | xinluzao3 | NIR | | 26 | baimian17 | YRR | 66 | xinluzao42 | NIR | | 27 | chaoyangmian1 | NSEMR | 67 | xinluzao45 | NIR | | 28 | Deltapine20 | NSEMR | 68 | xinluzao4 | NIR | | 29 | Delfos97-047 | NSEMR | 69 | xinluzao6 | NIR | | 30 | guannong1 | NSEMR | 70 | xinluzao8 | NIR | | 31 | han2490 | YRR | 71 | xinluzao9 | NIR | | 32 | han656 | YRR | 72 | xinxiang368 | YRR | | 33 | han559 | YRR | 73 | yu1335 | YRR | | 34 | han667 | YRR | 74 | yumian12 | YRR | | 35 | han686 | YRR | 75 | yuzao8E13 | YRR | | 36 | han9609 | YRR | 76 | yuzao910 | YRR | | 37 | heishanmian1 | NSEMR | 77 | yunzaoN177 | YRR | | 38 | Jingmian3 | NSEMR | 78 | yunzaoN95 | YRR | | 39 | Jinmian10 | YRR | 79 | zhong416 | YRR | | 40 | Jinmian21 | YRR | 80 | zhong425-5 | YRR | |

| Table S1 Information of the 160 early-maturity upland cotton accessions (continued) |
| --- |
| | No. | Varieties | Growing areas | No. | Varieties | Growing areas | | --- | --- | --- | --- | --- | --- | | 81 | zhong716 | YRR | 121 | xinluzao27 | NIR | | 82 | zhong751213 | YRR | 122 | xinluzao28 | NIR | | 83 | CRI10 | YRR | 123 | xinluzao29 | NIR | | 84 | CRI14 | YRR | 124 | xinluzao30 | NIR | | 85 | CRI16 | YRR | 125 | xinluzao32 | NIR | | 86 | CRI20 | YRR | 126 | xinluzao33 | NIR | | 87 | CRI24 | YRR | 127 | xinluzao34 | NIR | | 88 | CRI27 | YRR | 128 | xinluzao35 | NIR | | 89 | CRI30 | YRR | 129 | xinluzao37 | NIR | | 90 | CRI36 | YRR | 130 | xinluzao38 | NIR | | 91 | han256 | YRR | 131 | xinluzao39 | NIR | | 92 | CRI37 | YRR | 132 | xinluzao40 | NIR | | 93 | CRI42 | YRR | 133 | xinluzao41 | NIR | | 94 | CRI50 | YRR | 134 | xinluzao46 | NIR | | 95 | CRI58 | YRR | 135 | xinluzao47 | NIR | | 96 | CRI64 | YRR | 136 | xinluzao48 | NIR | | 97 | CRI74 | YRR | 137 | xinluzao49 | NIR | | 98 | liaomian23 | NSEMR | 138 | xinluzao50 | NIR | | 99 | liaomian27 | NSEMR | 139 | xinluzao51 | NIR | | 100 | liaomian28 | NSEMR | 140 | xinluzao60 | NIR | | 101 | xinluzao2 | NIR | 141 | huiyuan717 | NIR | | 102 | xinluzao10 | NIR | 142 | yunzao219 | YRR | | 103 | xinluzao12 | NIR | 143 | yunzao33-356 | YRR | | 104 | xinluzao13 | NIR | 144 | jinmian2 | NSEMR | | 105 | xinluzao15 | NIR | 145 | chaoyangmian2 | NSEMR | | 106 | xinluzao16 | NIR | 146 | dunhuang77-116 | NIR | | 107 | xinluzao17 | NIR | 147 | ganmian4 | NIR | | 108 | xinluzao18 | NIR | 148 | guannongzaoC-50 | NSEMR | | 109 | xinluzao19 | NIR | 149 | guannongchangzao14 | NSEMR | | 110 | xinluzao20 | NIR | 150 | yanzao1 | YRR | | 111 | xinluzao21 | NIR | 151 | yanzao2 | YRR | | 112 | xinluzao22 | NIR | 152 | yiaojinmian6 | NSEMR | | 113 | xinluzao23 | NIR | 153 | jinken69-2 | NIR | | 114 | xinluzao24 | NIR | 154 | jinken148-39 | NIR | | 115 | yumian5 | YRR | 155 | 611bo | NIR | | 116 | yumian18 | YRR | 156 | dunmian1 | NIR | | 117 | bo425 | NIR | 157 | dunmian2 | NIR | | 118 | kenN27-3 | NIR | 158 | ganmian2 | NIR | | 119 | xinluzao25 | NIR | 159 | keke1543 | NIR | | 120 | xinluzao26 | NIR | 160 | xinluzao53 | NIR | |
| YRR, Yellow River Region; NIR, Northwest Inland Region; NSEMR, Northern Specific Early-Maturity Region. |
